# Supplementary material for: Mitochondrial Dysfunction in Advanced Maternal Aged Cumulus Cells: A Possible Link to ATP Synthase Impairment?
Source: MDPI journal article supplement (doi:10.3390/biom14030281), 2024-02-26
Supplement: s1 [file s1]

## Supplementary data

**Supplementary Table S1** - Controlled ovarian stimulation (COS) protocols used for women undergoing in vitro fertilization in the study.

| <i>COH protocols</i>                  | <i>Number of patients</i> |
|---------------------------------------|---------------------------|
| <i>Short protocol with antagonist</i> | n=172                     |
| <i>Short protocol with agonist</i>    | n=3                       |
| <i>Long protocol</i>                  | n=41                      |
| <i>Mild stimulation</i>               | n=9                       |

**Note:** In all of protocols, hCG was injected when follicles reached 18 mm. 36 h after hCG injection, oocytes were retrieved transvaginally under ultrasound guidance

**Supplementary Table S2** - Sequence of primers used for RT-PCR study.

| <b>Primer name</b> | <b>Primer sequence (5'- 3')</b> |
|--------------------|---------------------------------|
| <b>mtMinArc f</b>  | GACATCTGGTTCCTACTTCAGGG         |
| <b>mtMinArc r</b>  | AGAGCTCCCGTGAGTGGTTA            |
| <b>β2m f</b>       | GGATTGGTATCTGAGGCTAGTAGG        |
| <b>β2m r</b>       | GAAATGAGGCTGGCAGAATAGG          |

**Supplementary Table S3** - Semen parameters of cycles in the young and the advanced age groups

| <i>Semen quality parameters</i>           | <i>Young group</i> | <i>Advanced maternal age group</i> | <i>p-value</i> | <i>*</i> |
|-------------------------------------------|--------------------|------------------------------------|----------------|----------|
| <i>Age (years)</i>                        | 33.99 ± 5.04       | 38.86 ± 4.67                       | <0.0001        | ***      |
| <i>Volume (mL)</i>                        | 2.93 ± 1.68        | 2.82 ± 1.78                        | 0.479          | NS       |
| <i>Concentration (million/mL)</i>         | 22.42 ± 27.41      | 33.09 ± 33.53                      | 0.0155         | *        |
| <i>Progressive motility (%)</i>           | 30.14 ± 20.29      | 27.82 ± 17.58                      | 0.549          | NS       |
| <b><i>After 30 minutes of swim up</i></b> |                    |                                    |                |          |
| <i>Concentration (million/mL)</i>         | 11.52 ± 22.97      | 15.05 ± 19.03                      | 0.0313         | *        |
| <i>Motility (%)</i>                       | 90.44 ± 28.34      | 93.53 ± 23.20                      | 0.3866         | NS       |

**Note:** Data are presented as the mean ± standard deviation (SD) or number/%. Mann Whitney test was applied and  $p < 0.05$  was considered statistically significant.

A

Table 1 - Clinical characteristics of patients in control group and young group

| Characteristics          | Control group | Young group  | p-value | *  |
|--------------------------|---------------|--------------|---------|----|
| Number of patients       | 40            | 140          |         |    |
| Age (y)                  | 27.80 ± 4.61  | 29.74 ± 4.12 | 0.0096  | ** |
| BMI (Kg/m <sup>2</sup> ) | 22.31 ± 3.70  | 23.73 ± 4.24 | 0.068   | NS |
| Basal serum AMH (ng/ml)  | 9.93 ± 2.71   | 4.29 ± 3.22  | 0.530   | NS |
| Opu egg number           | 16.37 ± 10.14 | 14.29 ± 8.70 | 0.278   | NS |
| MII oocyte number        | 10.19 ± 6.75  | 8.84 ± 5.70  | 0.356   | NS |

**Note:** Control group are young women without known infertility (that undergone fertility preservation or oocyte donation). Data are presented as the mean ± standard deviation (SD) or number/%. P<0.05 was considered statistically significant. AMH (anti-mullerian hormone) BMI (body mass index); CP (clinical pregnancy); D3 (Day 3); MII (metaphase II); OPU (ovum pick-up).

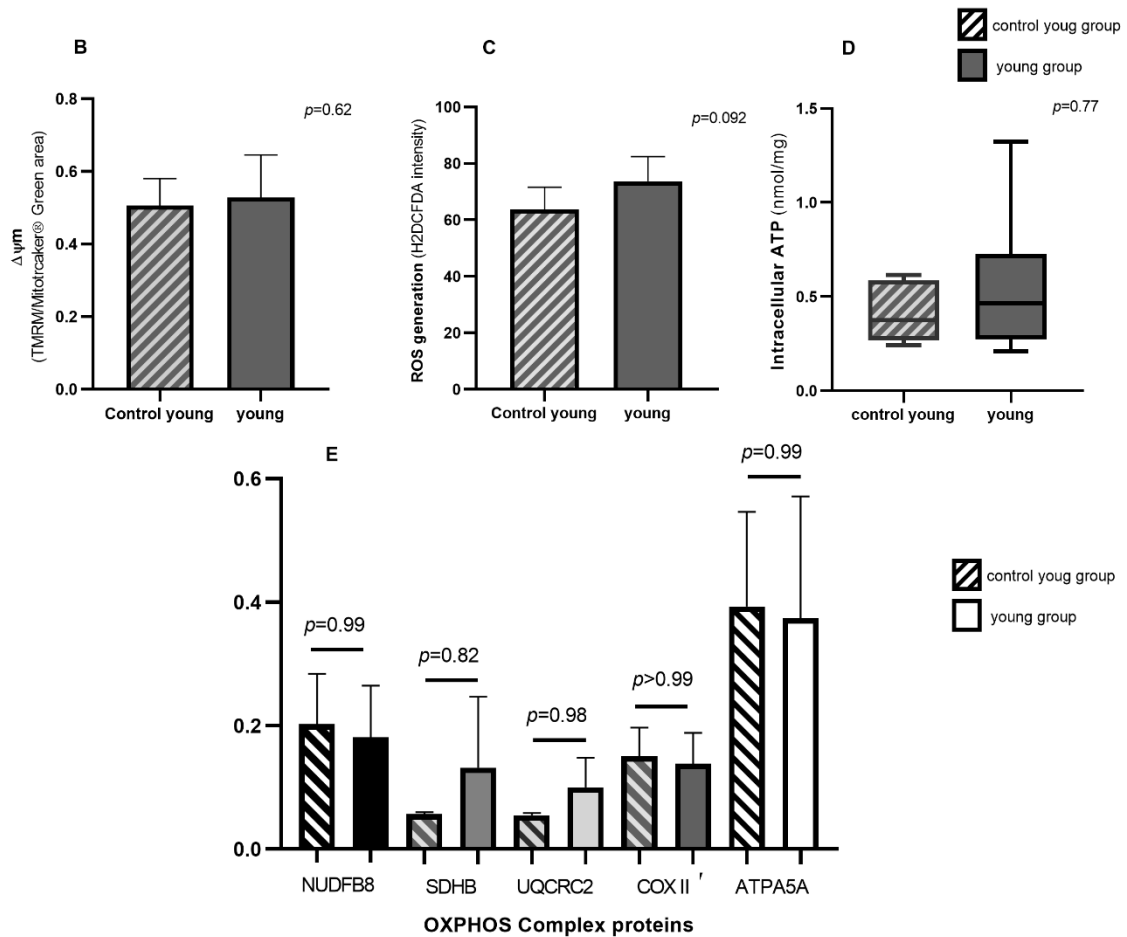

**Supplemental Figure S1 – Reproductive potential is similar in control young group and young group.** Clinical outcomes are similar between groups although control group is younger comparatively with young group (27.80 ± 4.61 versus 29.74 ± 4.12; p=0.0096), BMI (p=0.068), AMH levels (p=0.530), number of recovered (p=0.278) and MII oocytes (p=0.356) are similar. Mitochondrial function in control group and young group is equal, no differences were observed in Δψm between groups (p=0.62), neither in cytosolic ROS production (p=0.092) and intracellular ATP generation (p=0.77). The level of OXPHOS subunits protein is equal in both groups [NDUFB8 (p=0.99), SDHB (p=0.82), UQCRC2 (p=0.98) and COX2 (p>0.99) and ATP5A (p=0.99) subunits]. Mann-Whitney test was used for ROS and ATP production and one-way ANOVA for OXPHOS proteins, statistical significance considered when \* p < 0.05, \*\* p < 0.01, and \*\*\* p < 0.001.
